# Supplementary material for: Freezing-induced silk I crystallization of silk fibroin
Source: Royal Society of Chemistry journal article supplement (doi:10.1039/d0ce00360c), 2020-01-01
Supplement: d0ce00360c1.pdf [file d0ce00360c1.pdf]

***Supporting Information***  
***for***

**Freezing-induced silk I crystallization of silk fibroin**

Xiufang Li,<sup>a</sup> Qunmei Fan,<sup>a</sup> Qiang Zhang,<sup>a</sup> Shuqin Yan<sup>a</sup> and Renchuan You<sup>\*a</sup>

<sup>a</sup> State Key Laboratory for Hubei New Textile Materials and Advanced Processing Technologies, School of Textile Science and Engineering, Wuhan Textile University, Wuhan 430200, China.

\*Corresponding authors

E-mail:

yourenchuan1182@126.com (R. You)

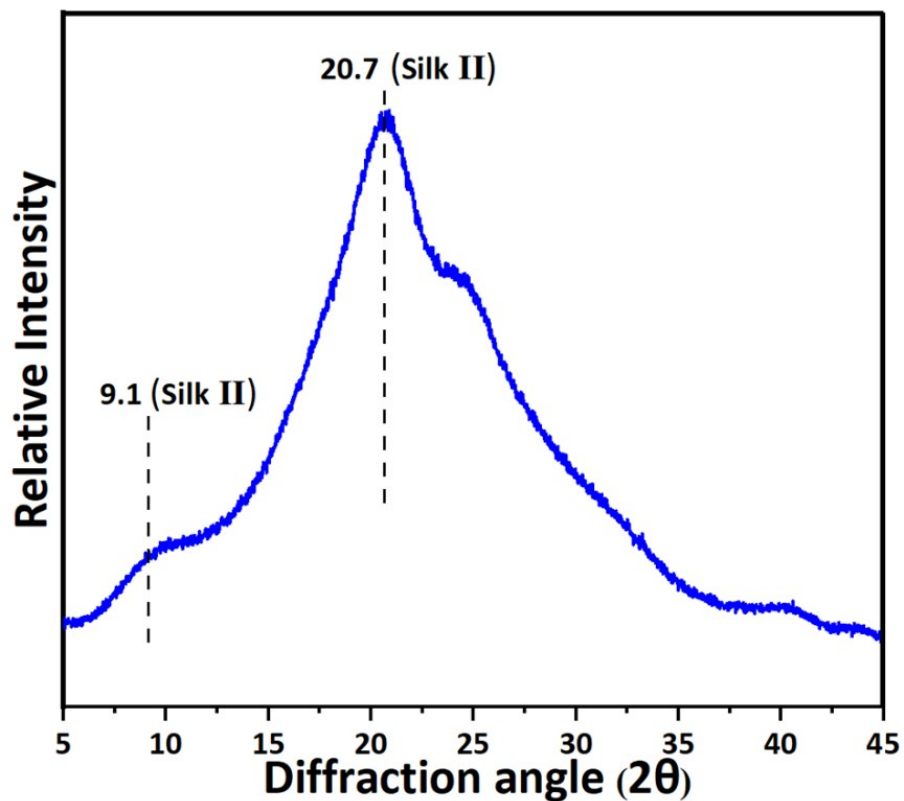

Figure S1. XRD curves of silk fibroin after 75% ethanol treatment.

In order to obtain silk fibroin sample with silk II structure, the silk I sponge was immersed into 75% ethanol for 2 h to induce structural change. After ethanol treatment, the sample was characterized by the diffraction peaks at  $9.1^{\circ}$  and  $20.7^{\circ}$  (Figure S1), corresponding to typical silk II structure.

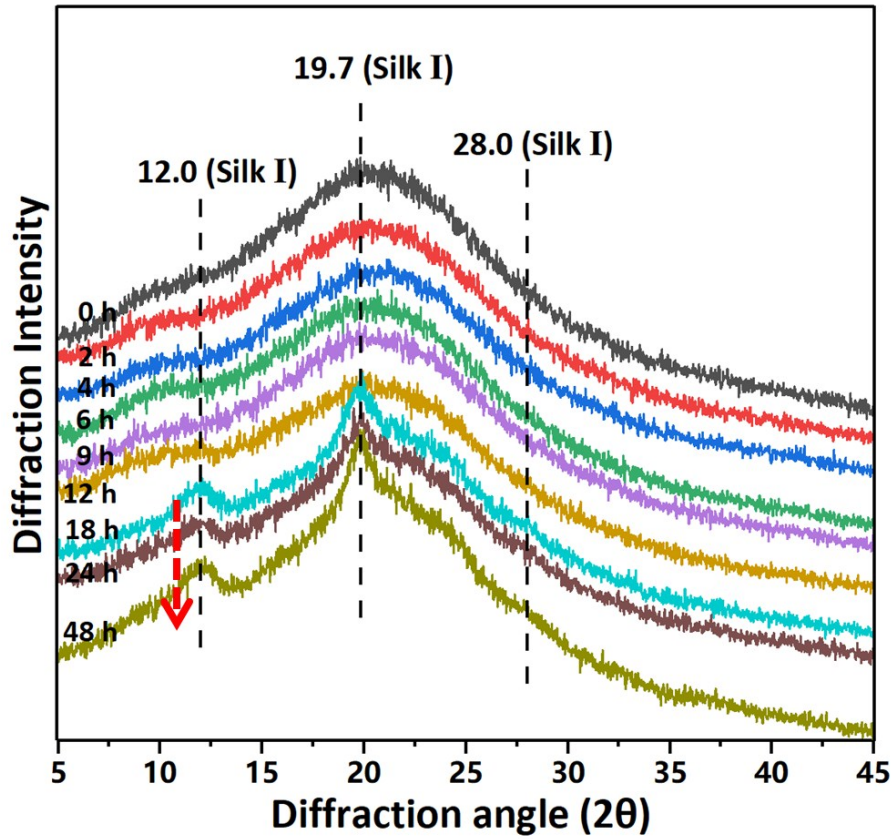

Figure S2. The crystallization kinetics of frozen 1.0 wt% silk fibroin solution after annealing. After freezing 1.0% silk fibroin solution at -40 °C and subsequent annealing treatment, the crystallization kinetics was determined by XRD (Figure S2). At 18 h, the typical silk I peaks at 12.0°, 19.7° and 28.0° appeared, indicating the formation of silk I crystallization after annealing for 18 h.
